# Supplementary material
Source: Springer Nature journal article supplement (https://www.springermedizin.de/resource/supplementary/12889_2012_5268_MOESM3_ESM.pdf/9495002)
Supplement: MOESM3 [file 9495002]

Changhua County

Fangyuan Township

Yunlin County

Dacheng Township

Lunbei Township

Maliu Township

Huwei Township

Tuku Township

Baozhong Township

Taini Township

Daji Township

Yuanchang Township

Sihhu Township

Beigang Township

Shuilin Township

Kouhu Township

Chiayi County

Dongshih Township

Budai Township

Tainan County

Bairten Township

Syueja Township

Yanshui Township

Pingtung County

Donggang Township

Linbian Township

Jiandong Township

Fangliao Township

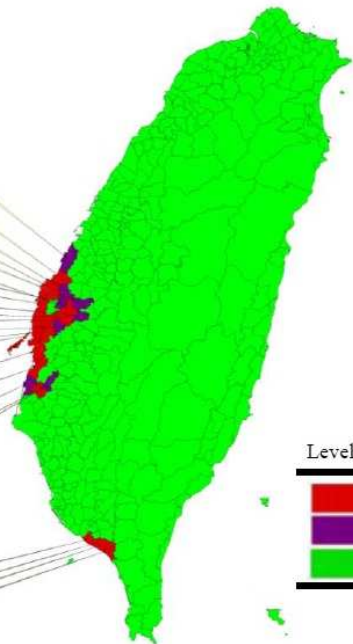

Levels of township-specific land subsidence

-  All region with serious land subsidence
-  Non-all region with serious land subsidence
-  No region with serious land subsidence
